# Supplementary material for: Influence of Environmental Factors on the Paralytic Shellfish Toxin Content and Profile of Alexandrium catenella (Dinophyceae) Isolated from the Mediterranean Sea
Source: MDPI journal article supplement (doi:10.3390/md11051583), 2013-05-15
Supplement: s1 [file s1]

marinedrugs-11-01583-s001.mol
  corina  04151403333D 1   1.00000     0.00000 
CORINA 3.49 0023  12.04.2013
 25 27  0  0  0  0  0  0  0  0999 V2000
   -0.0167    1.3790    0.0096 N   0  0  0  0  0  0  0  0  0  0  0  0
    0.0021   -0.0041    0.0020 C   0  0  0  0  0  0  0  0  0  0  0  0
    1.0889   -0.5832   -0.6068 N   0  0  0  0  0  0  0  0  0  0  0  0
    2.1344    0.1169   -1.3516 C   0  0  0  0  0  0  0  0  0  0  0  0
    2.1831    1.6146   -1.1028 C   0  0  0  0  0  0  0  0  0  0  0  0
    1.2585    2.0904    0.0013 C   0  0  0  0  0  0  0  0  0  0  0  0
    1.9476   -0.0289   -2.7991 N   0  0  0  0  0  0  0  0  0  0  0  0
    1.8775    1.2265   -3.3516 C   0  0  0  0  0  0  0  0  0  0  0  0
    1.7429    2.1969   -2.3890 N   0  0  0  0  0  0  0  0  0  0  0  0
    1.9502    1.8817    1.3499 C   0  0  0  0  0  0  0  0  0  0  0  0
    3.2065    1.9202   -0.8851 H   0  0  0  0  0  0  0  0  0  0  0  0
   -0.8564    1.8644    0.0163 H   0  0  0  0  0  0  0  0  0  0  0  0
   -0.9513   -0.7130    0.5382 N   0  3  0  0  0  0  0  0  0  0  0  0
    1.4653   -2.0046   -0.5907 C   0  0  0  0  0  0  0  0  0  0  0  0
    2.9968   -2.0602   -0.7720 C   0  0  0  0  0  0  0  0  0  0  0  0
    3.4387   -0.5827   -0.9201 C   0  0  0  0  0  0  0  0  0  0  0  0
    3.9029   -0.0647    0.3282 O   0  0  0  0  0  0  0  0  0  0  0  0
    4.4419   -0.4522   -1.9293 O   0  0  0  0  0  0  0  0  0  0  0  0
    3.4656   -2.5096    0.1035 H   0  0  0  0  0  0  0  0  0  0  0  0
    3.2515   -2.6233   -1.6698 H   0  0  0  0  0  0  0  0  0  0  0  0
    1.9324    1.4672   -4.6314 N   0  3  0  0  0  0  0  0  0  0  0  0
    1.1272    2.4406    2.4076 O   0  0  0  0  0  0  0  0  0  0  0  0
    1.5964    2.3391    3.6655 C   0  0  0  0  0  0  0  0  0  0  0  0
    2.6644    1.7983    3.8738 O   0  0  0  0  0  0  0  0  0  0  0  0
    0.8814    2.8374    4.6936 N   0  0  0  0  0  0  0  0  0  0  0  0
  1  2  1  0      
  2  3  1  0      
  3  4  1  0      
  4  5  1  0      
  5  6  1  0      
  6  1  1  0      
  4  7  1  0      
  7  8  1  0      
  8  9  1  0      
  9  5  1  0      
  6 10  1  0      
  5 11  1  0      
  1 12  1  0      
  2 13  2  0      
  3 14  1  0      
 14 15  1  0      
  4 16  1  0      
 15 16  1  0      
 16 17  1  0      
 16 18  1  0      
 15 19  1  0      
 15 20  1  0      
  8 21  2  0      
 10 22  1  0      
 22 23  1  0      
 23 24  2  0      
 23 25  1  0      
M  CHG  2  13   1  21   1
M  STY  1   1 SUP
M  SLB  1   1   1
M  SAL   1  4  22  23  24  25
M  SBL   1  1  24
M  SMT   1 OCONH2
M  SBV   1 24   -7.9639    5.9289
M  END
$$$$
