# Supplementary material for: Influence of Environmental Factors on the Paralytic Shellfish Toxin Content and Profile of Alexandrium catenella (Dinophyceae) Isolated from the Mediterranean Sea
Source: MDPI journal article supplement (doi:10.3390/md11051583), 2013-05-15
Supplement: s2 [file s2]

marinedrugs-11-01583-s001.mol
  ChemDraw02251409332D

 25 27  0  0  0  0  0  0  0  0999 V2000
   -1.2256   -0.0730    0.0000 N   0  0  0  0  0  0  0  0  0  0  0  0
   -1.2256   -0.8980    0.0000 C   0  0  0  0  0  0  0  0  0  0  0  0
   -0.5112   -1.3105    0.0000 N   0  0  0  0  0  0  0  0  0  0  0  0
    0.2033   -0.8980    0.0000 C   0  0  0  0  0  0  0  0  0  0  0  0
    0.2033   -0.0730    0.0000 C   0  0  0  0  0  0  0  0  0  0  0  0
   -0.5112    0.3395    0.0000 C   0  0  0  0  0  0  0  0  0  0  0  0
    0.9879   -1.1529    0.0000 N   0  0  0  0  0  0  0  0  0  0  0  0
    1.4729   -0.4855    0.0000 C   0  0  0  0  0  0  0  0  0  0  0  0
    0.9879    0.1820    0.0000 N   0  0  0  0  0  0  0  0  0  0  0  0
   -0.5112    1.1645    0.0000 C   0  0  0  0  0  0  0  0  0  0  0  0
    0.2033    0.7520    0.0000 H   0  0  0  0  0  0  0  0  0  0  0  0
   -1.9401    0.3395    0.0000 H   0  0  0  0  0  0  0  0  0  0  0  0
   -1.9401   -1.3105    0.0000 N   0  3  0  0  0  0  0  0  0  0  0  0
   -0.9237   -2.0249    0.0000 C   0  0  0  0  0  0  0  0  0  0  0  0
   -0.2092   -2.4374    0.0000 C   0  0  0  0  0  0  0  0  0  0  0  0
    0.4168   -1.6948    0.0000 C   0  0  0  0  0  0  0  0  0  0  0  0
    1.2137   -1.9084    0.0000 O   0  0  0  0  0  0  0  0  0  0  0  0
    0.8293   -2.4093    0.0000 O   0  0  0  0  0  0  0  0  0  0  0  0
   -0.7925   -3.0208    0.0000 H   0  0  0  0  0  0  0  0  0  0  0  0
    0.3742   -3.0208    0.0000 H   0  0  0  0  0  0  0  0  0  0  0  0
    2.2979   -0.4855    0.0000 N   0  3  0  0  0  0  0  0  0  0  0  0
   -0.8689    1.7833    0.0000 O   0  0  0  0  0  0  0  0  0  0  0  0
   -1.5834    2.1958    0.0000 C   0  0  0  0  0  0  0  0  0  0  0  0
   -1.5834    3.0208    0.0000 O   0  0  0  0  0  0  0  0  0  0  0  0
   -2.2979    1.7833    0.0000 N   0  0  0  0  0  0  0  0  0  0  0  0
  1  2  1  0      
  2  3  1  0      
  3  4  1  0      
  4  5  1  0      
  5  6  1  0      
  6  1  1  0      
  4  7  1  0      
  7  8  1  0      
  8  9  1  0      
  9  5  1  0      
  6 10  1  1      
  5 11  1  1      
  1 12  1  0      
  2 13  2  0      
  3 14  1  0      
 14 15  1  0      
  4 16  1  1      
 15 16  1  0      
 16 17  1  1      
 16 18  1  6      
 15 19  1  6      
 15 20  1  1      
  8 21  2  0      
 10 22  1  0      
 22 23  1  0      
 23 24  2  0      
 23 25  1  0      
M  CHG  2  13   1  21   1
M  STY  1   1 SUP
M  SLB  1   1   1
M  SAL   1  4  22  23  24  25
M  SBL   1  1  24
M  SMT   1 OCONH2
M  SBV   1 24   -7.9639    5.9289
M  END
